# Supplementary material for: Regional influence of ocean–atmosphere teleconnections on the timing and duration of MODIS-derived snow cover in British Columbia, Canada
Source: Copernicus journal article supplement (doi:10.5194/tc-13-2693-2019), 2019-10-15
Supplement: Supplementary file 1 [file tc-13-2693-2019-supplement.zip]

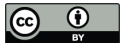

## *Supplement of*

# **Regional influence of ocean–atmosphere teleconnections on the timing and duration of MODIS-derived snow cover in British Columbia, Canada**

**Alexandre R. Bevington et al.**

*Correspondence to:* Alexandre R. Bevington ([alexandre.bevington@gov.bc.ca](mailto:alexandre.bevington@gov.bc.ca))

- tc-13-2693-2019-supplement-title-page.pdf
- sup01\_Annual\_LLS\_BC.csv
- sup02\_Annual\_rS\_BC.csv
- sup03\_Seasonal\_LLS\_BC.csv
- sup04\_Seasonal\_rS\_BC.csv
- sup05\_Annual\_LLS\_Hydrozone.csv
- sup06\_Annual\_rS\_Hydrozone.csv
- sup07\_Seasonal\_LLS\_Hydrozone.csv
- sup08\_Seasonal\_rS\_Hydrozone.csv
- sup09\_Annual\_LLS\_Hydrozone\_Elevation.csv
- sup10\_Annual\_rS\_Hydrozone+Elevation.csv
- sup11\_Seasonal\_LLS\_Hydrozone+Elevation.csv
- sup12\_Seasonal\_rS\_Hydrozone\_Elevation.csv
- sup13\_TimeSeries\_Annual\_LLS\_BC.csv
- sup14\_TimeSeries\_Seasonal\_LLS\_BC.csv
- sup15\_TimeSeries\_Annual\_LLS\_Hydrozones.csv
- sup16\_TimeSeries\_Seasonal\_LLS\_Hydrozones.csv
- sup17\_TimeSeries\_Annual\_LLS\_Hydrozones+Elevation.csv
- sup18\_TimeSeries\_Seasonal\_LLS\_Hydrozone+Elevation.csv
- sup19\_Annual\_LLS\_Hydrozone+Elevation\_Adjusted.csv
- sup20\_Annual\_rS\_Hydrozone+Elevation\_Adjusted.csv

The copyright of individual parts of the supplement might differ from the CC BY 4.0 License.
